# Supplementary material for: A complementary method with PFBBr-derivatization based on a GC-EI-MS platform for the simultaneous quantitation of short-, medium- and long-chain fatty acids in murine plasma and feces samples
Source: Royal Society of Chemistry journal article supplement (doi:10.1039/d3ay02271d), 2024-01-01
Supplement: d3ay02271d1.pdf [file d3ay02271d1.pdf]

## Supporting Information

### **A complementary method with PFBBBr-derivatization based on GC-EI-MS platform for the simultaneous quantitation of short-, medium- and long -chain fatty acids in murine plasma and feces samples**

Hong-Xu Zhou<sup>a,b#</sup>, Qing Jiang<sup>a,b#</sup>, Xin He<sup>a,b</sup>, Xian Fu<sup>a,b</sup>, Jun-Yan Liu<sup>a,b<sup>1</sup></sup>

<sup>a</sup>CNTTI of the Institute of Life Sciences & Anesthesia Department of the Second Affiliated Hospital, Chongqing Medical University, Chongqing, 400016, China

<sup>b</sup>Basic Medicine Research and Innovation Center for Novel Target and Therapeutic Intervention, Ministry of Education, Chongqing, 400016, China

<sup>#</sup>These authors contributed equally to this work.

**Table S1** The inter and intra-day of precision, accuracy for assays.

**Table S2.** The matrix effect, extraction recovery and stability for assays.

**Table S3.** The changes of FAs levels in different groups in feces and plasma

---

<sup>1</sup> To whom the correspondence should be addressed: Prof. Jun-Yan Liu, [jyliu@cqmu.edu.cn](mailto:jyliu@cqmu.edu.cn), Tel; +86-23-6848 3587, Fax: +86-23-6366 4820

**Table S1 The inter and intra-day of precision, accuracy for assays.**

| No. | Abbreviation | Inter-day assay (n=6) |       |       |      |                |        |        |        | Intra-day assay (n=18) |       |       |       |                |        |        |        |
|-----|--------------|-----------------------|-------|-------|------|----------------|--------|--------|--------|------------------------|-------|-------|-------|----------------|--------|--------|--------|
|     |              | Precision (RSD%)      |       |       |      | Accuracy (RE%) |        |        |        | Precision (RSD%)       |       |       |       | Accuracy (RE%) |        |        |        |
|     |              | LLOQ                  | QCL   | QCM   | QCH  | LLOQ           | QCL    | QCM    | QCH    | LLOQ                   | QCL   | QCM   | QCH   | LLOQ           | QCL    | QCM    | QCH    |
| 1   | FA 2:0       | 1.42                  | 0.78  | 2.61  | 0.89 | 106.55         | 99.67  | 95.70  | 90.73  | 4.39                   | 6.79  | 3.23  | 4.16  | 109.86         | 103.33 | 101.73 | 94.04  |
| 2   | FA 3:0       | 0.83                  | 1.22  | 3.19  | 0.37 | 105.02         | 105.02 | 94.63  | 88.92  | 4.99                   | 5.57  | 5.85  | 4.56  | 115.01         | 110.63 | 96.34  | 90.86  |
| 3   | FA 4:1       | 1.03                  | 1.16  | 3.47  | 0.50 | 108.61         | 99.05  | 94.28  | 91.69  | 5.39                   | 5.47  | 7.51  | 5.42  | 117.03         | 111.16 | 93.76  | 92.28  |
| 4   | FA 4:0       | 1.52                  | 0.76  | 2.61  | 0.68 | 106.49         | 97.49  | 87.63  | 86.36  | 5.73                   | 5.18  | 5.55  | 5.89  | 107.50         | 114.01 | 89.37  | 86.98  |
| 5   | FA 5:1       | 2.53                  | 3.80  | 3.37  | 0.56 | 115.53         | 105.53 | 94.41  | 93.43  | 4.91                   | 11.52 | 7.02  | 3.91  | 116.78         | 114.22 | 94.65  | 96.49  |
| 6   | FA 5:0       | 4.23                  | 6.03  | 3.98  | 1.91 | 103.65         | 103.64 | 101.03 | 93.00  | 5.57                   | 10.57 | 6.82  | 4.87  | 106.58         | 106.58 | 101.44 | 95.37  |
| 7   | FA 6:0       | 2.37                  | 1.51  | 9.08  | 1.21 | 112.50         | 102.51 | 86.07  | 91.60  | 17.07                  | 5.69  | 13.23 | 5.70  | 117.37         | 110.13 | 88.32  | 92.44  |
| 8   | FA 7:0       | 5.56                  | 10.37 | 7.82  | 1.43 | 112.95         | 107.95 | 89.93  | 90.54  | 14.63                  | 12.63 | 13.85 | 6.15  | 117.85         | 110.11 | 85.99  | 90.93  |
| 9   | FA 8:0       | 5.99                  | 7.71  | 7.29  | 0.93 | 103.69         | 113.69 | 107.66 | 111.72 | 11.88                  | 13.54 | 11.53 | 4.24  | 111.59         | 101.59 | 114.75 | 112.74 |
| 10  | FA 9:0       | 10.58                 | 11.29 | 6.48  | 2.67 | 89.84          | 99.84  | 86.53  | 103.62 | 13.37                  | 10.41 | 9.13  | 8.24  | 101.30         | 101.30 | 93.06  | 110.85 |
| 11  | FA 10:0      | 6.74                  | 0.91  | 1.61  | 1.76 | 100.34         | 109.74 | 110.13 | 113.11 | 7.95                   | 8.91  | 11.69 | 4.96  | 114.14         | 102.14 | 113.45 | 113.36 |
| 12  | FA 11:0      | 13.58                 | 2.21  | 1.62  | 4.39 | 109.02         | 89.01  | 96.81  | 106.71 | 13.92                  | 10.51 | 13.42 | 11.36 | 115.53         | 95.53  | 92.79  | 110.42 |
| 13  | FA 12:0      | 11.32                 | 1.33  | 11.96 | 2.56 | 109.47         | 99.47  | 87.49  | 104.52 | 14.81                  | 14.07 | 14.73 | 11.81 | 112.35         | 92.35  | 85.51  | 106.89 |
| 14  | FA 13:0      | 15.48                 | 14.86 | 6.29  | 7.21 | 108.40         | 88.40  | 88.08  | 101.90 | 17.25                  | 11.14 | 14.39 | 10.25 | 116.17         | 106.17 | 90.68  | 102.60 |
| 15  | FA 14:1      | 14.58                 | 2.48  | 0.79  | 8.72 | 109.16         | 90.17  | 95.37  | 92.44  | 16.99                  | 5.25  | 7.58  | 18.85 | 110.37         | 114.38 | 104.09 | 90.59  |
| 16  | FA 14:0      | 7.87                  | 6.14  | 12.87 | 7.59 | 104.93         | 89.31  | 97.26  | 110.37 | 12.26                  | 13.79 | 10.78 | 14.41 | 85.94          | 98.51  | 114.64 | 112.70 |
| 17  | FA 15:1      | 9.90                  | 3.68  | 8.76  | 8.06 | 99.33          | 93.31  | 90.57  | 85.18  | 17.82                  | 14.25 | 10.64 | 14.86 | 118.69         | 98.71  | 87.03  | 89.05  |
| 18  | FA 15:0      | 15.63                 | 4.89  | 1.75  | 7.76 | 118.32         | 110.33 | 85.36  | 102.67 | 17.81                  | 13.11 | 8.56  | 14.14 | 88.94          | 93.41  | 92.30  | 102.53 |
| 19  | FA 16:1T     | 10.64                 | 9.33  | 2.08  | 7.73 | 108.36         | 95.76  | 105.10 | 92.25  | 13.69                  | 13.78 | 6.70  | 10.29 | 95.63          | 112.69 | 113.91 | 92.31  |
| 20  | FA 16:1      | 5.03                  | 10.79 | 3.07  | 7.80 | 116.35         | 109.47 | 97.67  | 95.91  | 19.55                  | 10.92 | 8.49  | 10.36 | 117.63         | 112.59 | 108.11 | 95.52  |
| 21  | FA 16:0      | 4.38                  | 12.75 | 9.33  | 4.02 | 83.36          | 89.23  | 98.89  | 106.18 | 9.16                   | 7.60  | 11.29 | 10.54 | 82.93          | 86.46  | 88.60  | 111.34 |
| 22  | FA 17:1T     | 10.66                 | 5.01  | 0.42  | 5.59 | 95.36          | 89.15  | 113.23 | 95.71  | 12.56                  | 12.60 | 5.12  | 13.08 | 99.88          | 97.62  | 108.88 | 96.83  |

|    |            |       |       |       |       |        |        |        |        |       |       |       |       |        |        |        |        |
|----|------------|-------|-------|-------|-------|--------|--------|--------|--------|-------|-------|-------|-------|--------|--------|--------|--------|
| 23 | FA 17:0    | 11.04 | 3.41  | 4.14  | 7.19  | 102.33 | 88.12  | 112.31 | 98.85  | 13.25 | 7.69  | 6.24  | 10.41 | 102.44 | 110.88 | 110.85 | 98.82  |
| 24 | FA 18:3N6  | 12.90 | 8.02  | 2.47  | 3.78  | 103.65 | 99.59  | 104.29 | 89.96  | 16.30 | 14.61 | 14.03 | 6.31  | 118.43 | 111.99 | 114.44 | 87.68  |
| 25 | FA 18:2N6  | 13.84 | 13.08 | 1.74  | 4.14  | 112.38 | 102.51 | 86.39  | 89.61  | 15.61 | 12.79 | 6.16  | 8.53  | 112.56 | 108.95 | 85.26  | 86.85  |
| 26 | FA 18:1N9C | 4.30  | 3.51  | 1.92  | 5.90  | 89.36  | 88.25  | 87.03  | 89.62  | 9.77  | 11.63 | 5.44  | 12.84 | 110.89 | 96.32  | 85.23  | 85.16  |
| 27 | FA 18:3N3  | 12.62 | 9.38  | 2.35  | 5.60  | 116.29 | 114.22 | 86.48  | 86.66  | 15.33 | 11.17 | 10.78 | 11.01 | 109.68 | 114.32 | 86.42  | 90.98  |
| 28 | FA 18:1N9T | 10.18 | 9.16  | 2.88  | 6.48  | 109.94 | 105.69 | 99.49  | 87.06  | 18.15 | 12.07 | 11.26 | 12.23 | 99.59  | 96.59  | 94.07  | 93.80  |
| 29 | FA 18:1N7  | 11.88 | 9.43  | 2.86  | 5.48  | 118.49 | 110.06 | 114.95 | 89.38  | 14.51 | 13.26 | 8.17  | 12.67 | 107.59 | 95.33  | 113.43 | 85.28  |
| 30 | FA 18:0    | 8.63  | 13.04 | 11.27 | 6.43  | 109.58 | 88.69  | 112.48 | 105.85 | 9.88  | 10.40 | 12.44 | 13.84 | 110.39 | 96.32  | 112.96 | 109.79 |
| 31 | FA 19:1N9T | 13.64 | 6.67  | 2.19  | 3.91  | 106.89 | 112.63 | 102.27 | 88.25  | 17.71 | 9.57  | 3.73  | 8.37  | 110.95 | 112.17 | 102.89 | 89.61  |
| 32 | FA 19:0    | 10.45 | 6.11  | 1.32  | 4.69  | 116.69 | 95.03  | 103.56 | 86.65  | 14.52 | 7.32  | 4.80  | 10.66 | 89.65  | 110.87 | 102.30 | 86.06  |
| 33 | FA 20:4N6  | 11.53 | 10.29 | 4.35  | 3.04  | 112.45 | 96.25  | 102.39 | 86.71  | 13.93 | 14.43 | 5.61  | 4.05  | 109.75 | 103.86 | 102.70 | 87.09  |
| 34 | FA 20:5N3  | 9.87  | 10.98 | 5.91  | 5.25  | 104.75 | 92.51  | 89.17  | 89.14  | 14.25 | 10.47 | 7.78  | 3.75  | 100.85 | 90.25  | 86.15  | 91.18  |
| 35 | FA 20:1T   | 10.07 | 12.31 | 9.44  | 3.46  | 112.59 | 105.57 | 111.59 | 93.13  | 12.91 | 14.47 | 10.44 | 7.06  | 109.59 | 114.18 | 114.32 | 91.88  |
| 36 | FA 20:1    | 8.09  | 12.71 | 7.67  | 4.05  | 116.35 | 90.23  | 114.59 | 88.19  | 13.95 | 14.39 | 10.52 | 8.38  | 115.84 | 95.11  | 112.93 | 85.79  |
| 37 | FA 20:2    | 10.34 | 13.35 | 4.27  | 5.76  | 98.56  | 105.05 | 107.85 | 87.66  | 11.50 | 14.11 | 9.56  | 9.49  | 102.59 | 114.94 | 108.68 | 85.06  |
| 38 | FA 20:0    | 9.01  | 1.79  | 3.49  | 5.40  | 94.55  | 101.84 | 95.91  | 91.54  | 10.16 | 7.10  | 6.16  | 12.26 | 112.86 | 110.57 | 93.73  | 87.09  |
| 39 | FA 21:0    | 5.89  | 5.00  | 2.93  | 3.44  | 108.55 | 98.45  | 109.58 | 86.61  | 8.74  | 7.59  | 13.75 | 8.39  | 109.63 | 93.46  | 106.03 | 87.70  |
| 40 | FA 22:0    | 14.61 | 12.69 | 9.92  | 13.32 | 81.29  | 95.82  | 110.14 | 97.31  | 19.30 | 12.00 | 13.99 | 13.01 | 107.59 | 94.25  | 100.18 | 98.02  |
| 41 | FA 22:6N3  | 12.29 | 11.21 | 3.96  | 1.82  | 80.99  | 112.81 | 95.23  | 87.12  | 16.89 | 11.06 | 7.07  | 4.74  | 100.29 | 94.22  | 104.76 | 86.42  |
| 42 | FA 22:2    | 10.91 | 5.89  | 0.82  | 3.33  | 109.28 | 104.32 | 98.99  | 87.96  | 11.80 | 6.50  | 3.97  | 8.42  | 114.87 | 112.63 | 98.87  | 86.18  |
| 43 | FA 23:0    | 9.05  | 6.71  | 2.24  | 3.25  | 99.57  | 104.09 | 101.48 | 88.23  | 9.96  | 9.08  | 4.74  | 8.23  | 118.52 | 110.58 | 100.68 | 88.71  |
| 44 | FA 24:0    | 10.52 | 6.05  | 2.16  | 2.32  | 96.59  | 101.89 | 93.03  | 86.74  | 12.73 | 5.41  | 3.18  | 7.39  | 110.35 | 100.15 | 94.06  | 89.76  |

**Table S2. The matrix effect, extraction recovery and stability for assays.**

| NO. | Abbreviation | Extraction recovery (%) |        |        | Matrix effect (%) |        |        | Stability (%) |       |
|-----|--------------|-------------------------|--------|--------|-------------------|--------|--------|---------------|-------|
|     |              | QCL                     | QCM    | QCH    | QCL               | QCM    | QCH    | 24 h          | 48 h  |
| 1   | FA 2:0       | 89.53                   | 118.79 | 117.73 | 89.63             | 86.46  | 87.25  | 92.48         | 92.64 |
| 2   | FA 3:0       | 86.14                   | 117.49 | 88.00  | 86.97             | 85.44  | 89.22  | 91.68         | 92.11 |
| 3   | FA 4:1       | 83.19                   | 94.82  | 109.12 | 85.63             | 91.80  | 99.01  | 90.26         | 90.80 |
| 4   | FA 4:0       | 89.01                   | 87.10  | 103.58 | 86.51             | 88.09  | 94.52  | 89.34         | 89.74 |
| 5   | FA 5:1       | 100.41                  | 101.79 | 108.25 | 102.78            | 97.81  | 98.21  | 93.72         | 94.26 |
| 6   | FA 5:0       | 85.56                   | 87.41  | 108.01 | 88.12             | 86.82  | 97.91  | 93.06         | 93.82 |
| 7   | FA 6:0       | 83.42                   | 104.42 | 111.56 | 90.02             | 101.93 | 101.36 | 92.08         | 93.16 |
| 8   | FA 7:0       | 89.03                   | 103.93 | 112.37 | 89.30             | 100.44 | 101.99 | 91.88         | 92.98 |
| 9   | FA 8:0       | 81.41                   | 104.96 | 108.42 | 85.98             | 88.81  | 86.55  | 93.71         | 94.40 |
| 10  | FA 9:0       | 85.08                   | 104.16 | 116.12 | 88.98             | 88.01  | 92.77  | 89.45         | 91.32 |
| 11  | FA 10:0      | 94.66                   | 115.81 | 109.47 | 110.48            | 99.08  | 87.57  | 93.13         | 93.85 |
| 12  | FA 11:0      | 98.98                   | 115.29 | 120.71 | 100.34            | 104.59 | 98.06  | 86.67         | 89.34 |
| 13  | FA 12:0      | 88.21                   | 106.13 | 114.81 | 86.32             | 89.86  | 99.62  | 84.65         | 87.56 |
| 14  | FA 13:0      | 88.27                   | 120.39 | 119.25 | 91.17             | 101.44 | 104.50 | 82.41         | 85.88 |
| 15  | FA 14:1      | 92.61                   | 108.29 | 117.36 | 95.53             | 107.60 | 114.11 | 77.26         | 81.57 |
| 16  | FA 14:0      | 96.20                   | 86.53  | 118.02 | 87.09             | 90.35  | 105.12 | 84.96         | 87.82 |
| 17  | FA 15:1      | 105.21                  | 110.58 | 118.69 | 113.66            | 114.89 | 110.90 | 73.11         | 77.00 |
| 18  | FA 15:0      | 100.15                  | 103.06 | 113.95 | 105.50            | 114.34 | 113.44 | 80.19         | 84.00 |
| 19  | FA 16:1T     | 79.09                   | 116.84 | 117.01 | 102.29            | 112.35 | 103.61 | 80.51         | 83.08 |
| 20  | FA 16:1      | 103.45                  | 107.50 | 116.55 | 92.44             | 97.31  | 110.60 | 79.24         | 83.45 |
| 21  | FA 16:0      | 93.28                   | 102.97 | 114.98 | 117.14            | 111.73 | 108.38 | 86.48         | 88.84 |
| 22  | FA 17:1T     | 83.83                   | 106.38 | 97.85  | 86.24             | 89.83  | 113.42 | 81.30         | 84.03 |
| 23  | FA 17:0      | 100.57                  | 120.23 | 153.62 | 112.23            | 113.44 | 104.83 | 79.90         | 83.38 |

|    |            |        |        |        |        |        |        |       |       |
|----|------------|--------|--------|--------|--------|--------|--------|-------|-------|
| 24 | FA 18:3N6  | 96.43  | 97.13  | 118.13 | 91.07  | 89.96  | 112.23 | 90.67 | 93.49 |
| 25 | FA 18:2N6  | 110.72 | 117.27 | 118.16 | 105.48 | 103.11 | 108.36 | 87.34 | 88.65 |
| 26 | FA 18:1N9C | 88.32  | 112.17 | 119.53 | 108.73 | 107.12 | 112.91 | 81.64 | 84.01 |
| 27 | FA 18:3N3  | 101.35 | 109.29 | 112.15 | 104.82 | 106.57 | 100.45 | 87.37 | 89.37 |
| 28 | FA 18:1N9T | 110.92 | 115.26 | 118.64 | 98.14  | 86.42  | 100.14 | 83.07 | 85.79 |
| 29 | FA 18:1N7  | 108.90 | 104.85 | 117.55 | 103.36 | 86.25  | 112.25 | 83.12 | 85.93 |
| 30 | FA 18:0    | 97.58  | 83.85  | 116.84 | 99.37  | 90.30  | 107.22 | 80.42 | 83.95 |
| 31 | FA 19:1N9T | 108.78 | 77.35  | 117.46 | 103.17 | 85.19  | 112.88 | 87.63 | 89.27 |
| 32 | FA 19:0    | 106.40 | 110.91 | 119.58 | 110.35 | 110.23 | 102.61 | 84.33 | 86.20 |
| 33 | FA 20:4N6  | 104.03 | 107.26 | 113.31 | 102.77 | 110.96 | 114.34 | 92.77 | 93.35 |
| 34 | FA 20:5N3  | 87.05  | 107.80 | 112.61 | 119.55 | 113.28 | 112.89 | 98.00 | 89.99 |
| 35 | FA 20:1T   | 105.03 | 96.00  | 113.45 | 104.58 | 106.40 | 113.18 | 92.01 | 93.53 |
| 36 | FA 20:1    | 81.35  | 110.11 | 117.86 | 113.39 | 104.11 | 109.21 | 88.46 | 89.59 |
| 37 | FA 20:2    | 91.96  | 88.95  | 116.80 | 89.43  | 108.29 | 111.60 | 88.92 | 87.94 |
| 38 | FA 20:0    | 113.30 | 103.61 | 114.95 | 110.81 | 112.52 | 113.22 | 83.67 | 85.81 |
| 39 | FA 21:0    | 88.24  | 90.58  | 113.13 | 89.37  | 82.58  | 102.18 | 86.94 | 88.08 |
| 40 | FA 22:0    | 107.22 | 117.47 | 119.23 | 88.31  | 113.57 | 111.78 | 95.13 | 95.17 |
| 41 | FA 22:6N3  | 80.32  | 91.08  | 108.73 | 103.25 | 109.85 | 114.21 | 93.45 | 93.39 |
| 42 | FA 22:2    | 109.18 | 108.45 | 115.82 | 106.52 | 111.06 | 107.09 | 87.04 | 88.36 |
| 43 | FA 23:0    | 104.97 | 114.50 | 112.60 | 102.09 | 106.69 | 103.67 | 87.03 | 88.34 |
| 44 | FA 24:0    | 113.36 | 114.41 | 111.67 | 113.28 | 107.39 | 102.63 | 88.70 | 89.11 |

---

**Table S3. The changes of FAs levels in different groups in feces and plasma**

| No. | Abbreviation | Control group (mean $\pm$ SD) | DON group (mean $\pm$ SD) | Control group versus DON group |                              |             |
|-----|--------------|-------------------------------|---------------------------|--------------------------------|------------------------------|-------------|
|     |              |                               |                           | VIP value <sup>a</sup>         | <i>p</i> -value <sup>b</sup> | Fold change |
| 1   | FA 2:0_F     | 83.21 $\pm$ 46.67             | 141.30 $\pm$ 51.86        | 0.8353                         | 0.0260                       | 0.59        |
| 2   | FA 4:1_F     | 1.80 $\pm$ 1.19               | 0.95 $\pm$ 0.48           | 0.8729                         | 0.0485                       | 1.89        |
| 3   | FA 4:0_F     | 6.79 $\pm$ 5.84               | 17.26 $\pm$ 9.41          | 0.8011                         | 0.0062                       | 0.39        |
| 4   | FA 10:0_F    | 3.53 $\pm$ 2.07               | 11.14 $\pm$ 4.18          | 1.1898                         | 0.0005                       | 0.32        |
| 5   | FA 14:0_F    | 2.75 $\pm$ 0.62               | 8.66 $\pm$ 2.24           | 1.5209                         | <0.0001                      | 0.32        |
| 6   | FA 15:0_F    | 3.96 $\pm$ 1.63               | 10.93 $\pm$ 3.61          | 0.4692                         | <0.0001                      | 0.36        |
| 7   | FA 16:1T_F   | 1.72 $\pm$ 0.41               | 3.12 $\pm$ 0.81           | 1.3185                         | 0.0004                       | 0.55        |
| 8   | FA 16:0_F    | 71.68 $\pm$ 20.05             | 171.60 $\pm$ 32.69        | 1.4937                         | <0.0001                      | 0.42        |
| 9   | FA 17:0_F    | 3.36 $\pm$ 0.72               | 7.63 $\pm$ 0.73           | 1.5963                         | <0.0001                      | 0.44        |
| 10  | FA 18:1N9C_F | 27.78 $\pm$ 10.93             | 57.83 $\pm$ 16.18         | 1.3110                         | 0.0003                       | 0.48        |
| 11  | FA 18:1N9T_F | 4.23 $\pm$ 1.37               | 11.26 $\pm$ 4.62          | 1.3051                         | 0.0004                       | 0.38        |
| 12  | FA 18:0_F    | 73.10 $\pm$ 12.98             | 129.43 $\pm$ 15.09        | 1.5023                         | <0.0001                      | 0.56        |
| 13  | FA 19:0_F    | 1.65 $\pm$ 0.38               | 2.31 $\pm$ 0.32           | 1.1276                         | 0.0010                       | 0.71        |
| 14  | FA 20:0_F    | 18.00 $\pm$ 4.51              | 21.64 $\pm$ 2.75          | 0.7521                         | 0.0569                       | 0.83        |
| 15  | FA 23:0_F    | 6.07 $\pm$ 1.64               | 8.76 $\pm$ 0.87           | 1.1864                         | 0.0002                       | 0.69        |
| 16  | FA 10:0_P    | 36.24 $\pm$ 16.61             | 51.17 $\pm$ 11.21         | 1.4051                         | 0.0211                       | 0.71        |
| 17  | FA 12:0_P    | 11.50 $\pm$ 10.39             | 18.64 $\pm$ 9.50          | 1.0834                         | 0.0894                       | 0.62        |
| 18  | FA 14:1_P    | 0.89 $\pm$ 0.23               | 0.69 $\pm$ 0.19           | 1.2145                         | 0.0836                       | 1.29        |
| 19  | FA 16:1_P    | 1.81 $\pm$ 2.08               | 0.25 $\pm$ 0.36           | 1.4599                         | 0.0301                       | 7.34        |
| 20  | FA 17:0_P    | 0.16 $\pm$ 0.05               | 0.23 $\pm$ 0.10           | 1.3034                         | 0.0340                       | 0.67        |
| 21  | FA 20:4N6_P  | 2.89 $\pm$ 0.75               | 2.02 $\pm$ 0.55           | 1.5857                         | 0.0095                       | 1.43        |

a The VIP value was from the OPLS mode.

b The *p*-value was calculated from the Student's *t*-test.
